# Supplementary material
Source: PubMed Central journal article supplement (PMC7434657)
Supplement: NIHMS1606855-supplement-Supplementary_Information.pdf [file NIHMS1606855-supplement-Supplementary_Information.pdf]

## Supporting Information

### **Metabolomics Profiles of Smokers from Two Ethnic Groups with Differing Lung Cancer Risk**

Romel Dator<sup>1</sup>, Peter W. Villalta<sup>1</sup>, Nicole Thomson<sup>1</sup>, Joni Jensen<sup>4</sup>, Dorothy K. Hatsukami<sup>1,4</sup>,  
Irina Stepanov<sup>1,3</sup>, Benedikt Warth<sup>2,5\*</sup>, and Silvia Balbo<sup>1,3\*</sup>

<sup>1</sup>Masonic Cancer Center, University of Minnesota, Minneapolis, MN 55455, United States

<sup>2</sup>Department of Food Chemistry and Toxicology, Faculty of Chemistry, University of Vienna,  
Währingerstraße 38, 1090 Vienna, Austria

<sup>3</sup>Division of Environmental Health Sciences, School of Public Health, University of Minnesota,  
Minneapolis, MN 55455, United States

<sup>4</sup>Department of Psychiatry, University of Minnesota, Minneapolis, MN 55455, United States

<sup>5</sup>Scripps Center for Metabolomics, The Scripps Research Institute, La Jolla, CA 92037, United  
States

\*Senior corresponding authors

Phone: (612) 624-4240

Fax: (612) 624-3869

Email: balbo006@umn.edu; benedikt.warth@univie.ac.at

**Figure S1**

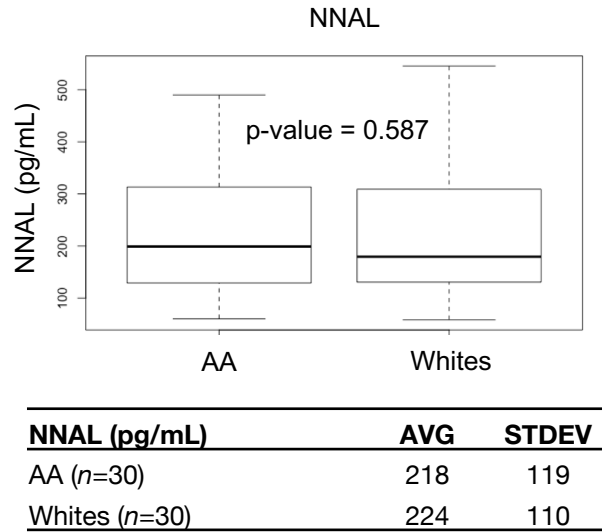

**Fig. S1.** Levels of NNAL (pg/mL) in urine of the 60 subjects used in the metabolomics analysis.

Figure S2

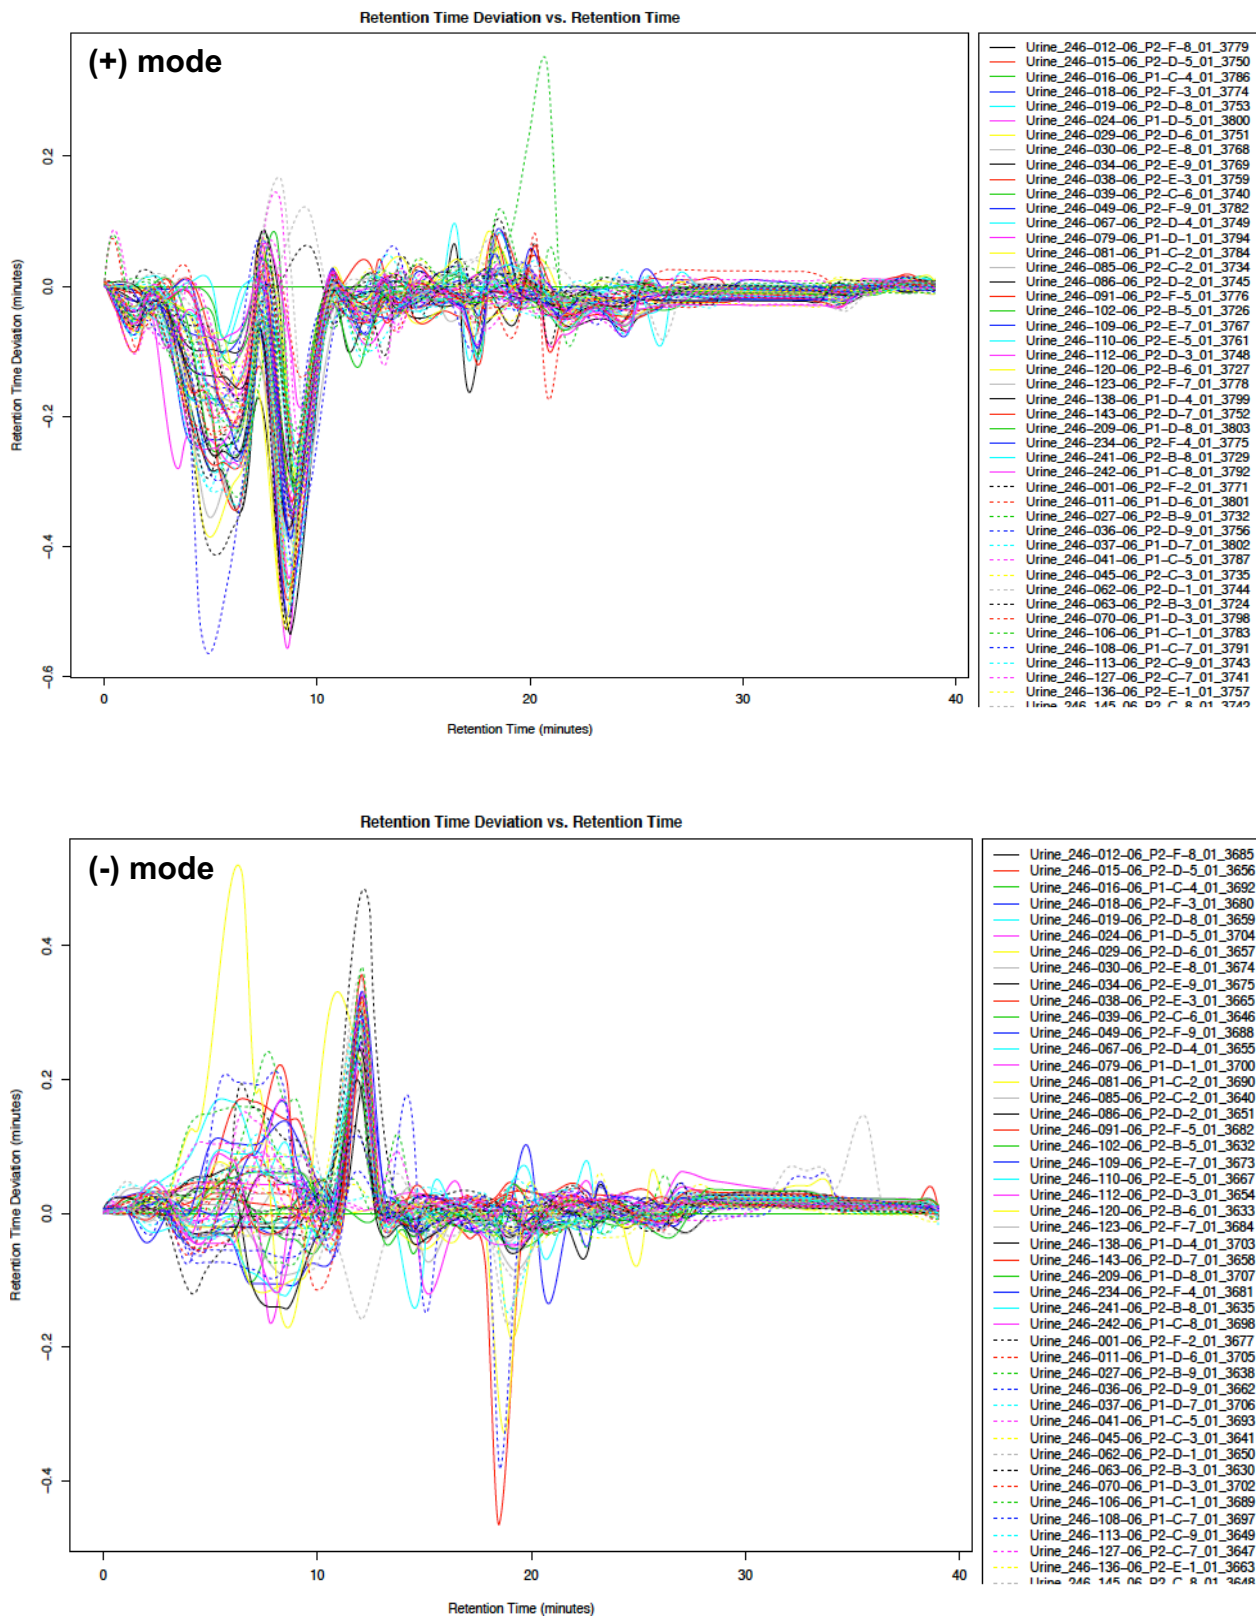

Fig. S2. Retention time deviation versus retention time of the 60 samples in positive (top panel) and negative mode data acquisition (bottom panel).

Figure S3

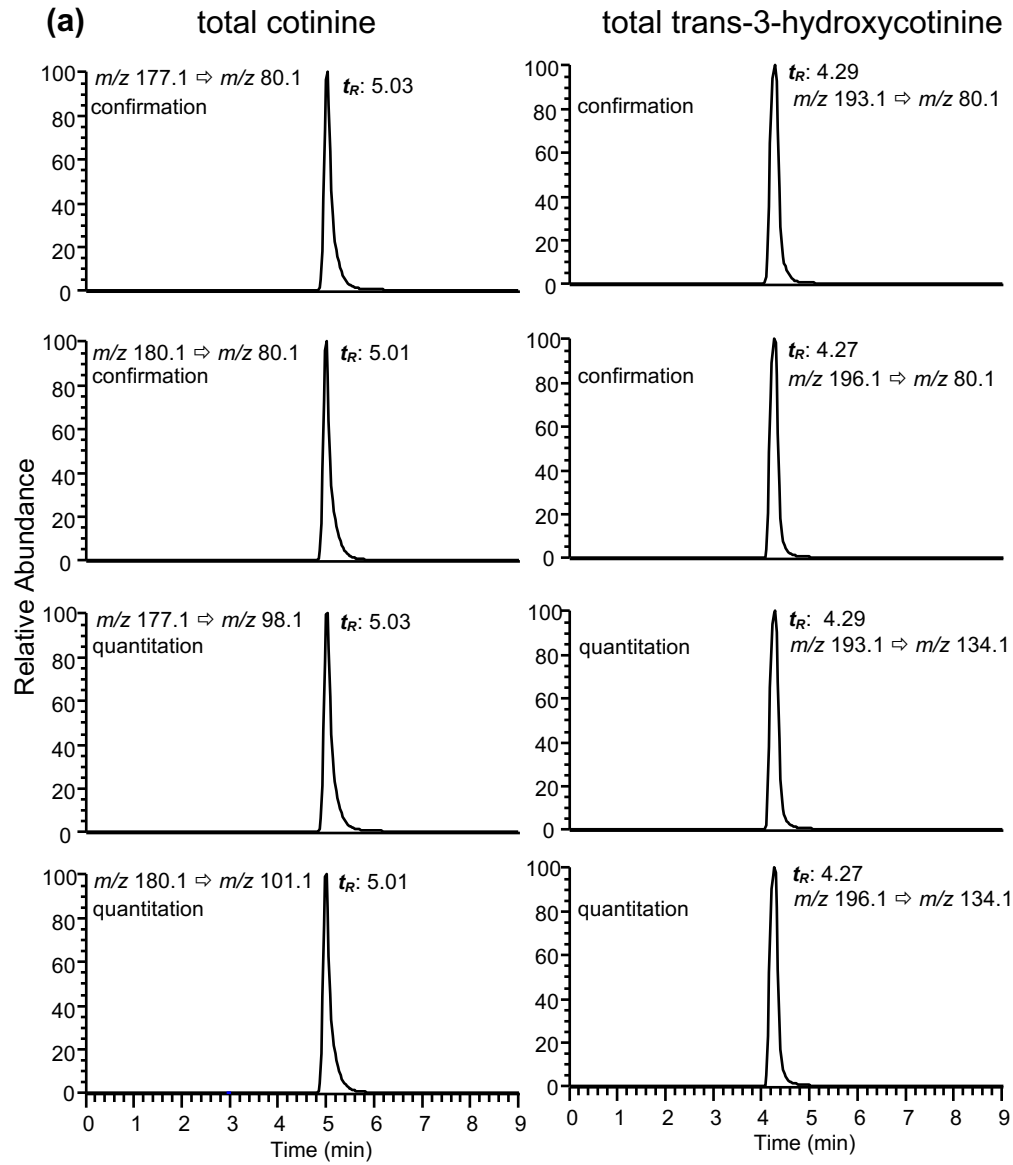

**Figure S3 (cont.)**

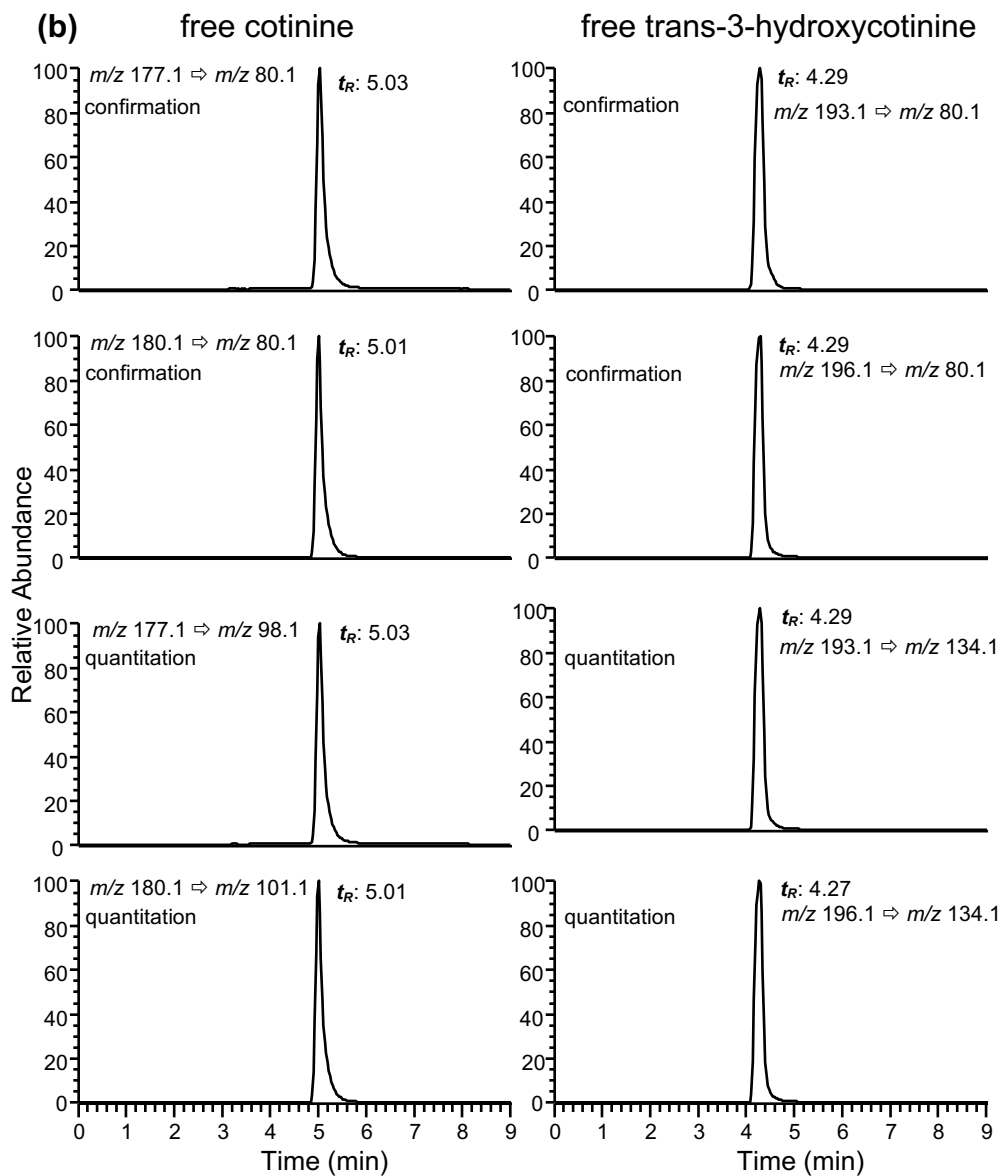

**Fig. S3.** (a) Extracted ion chromatograms (EICs) of the SRM transitions of total cotinine and trans-3-hydroxycotinine; (b) EICs of the SRM transitions of free cotinine and trans-3-hydroxycotinine.

**Figure S4**

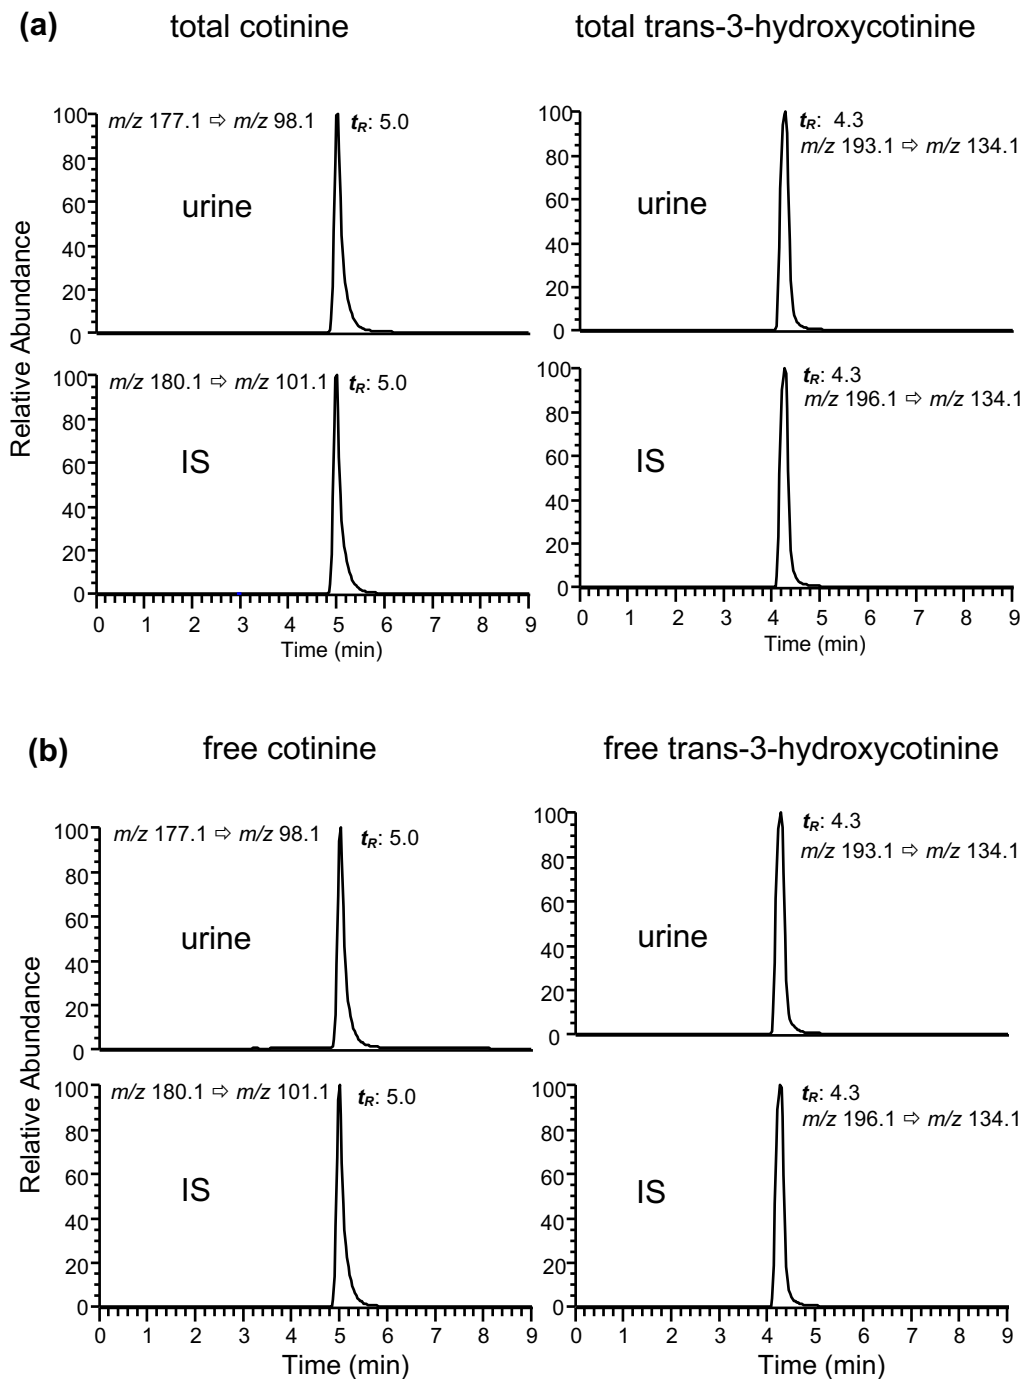

**Fig. S4.** Representative EICs of the SRM transitions of (a) total cotinine and trans-3-hydroxycotinine; (b) free cotinine and trans-3-hydroxycotinine in urine samples with corresponding  $d_3$ -labeled IS.

**Figure S5**

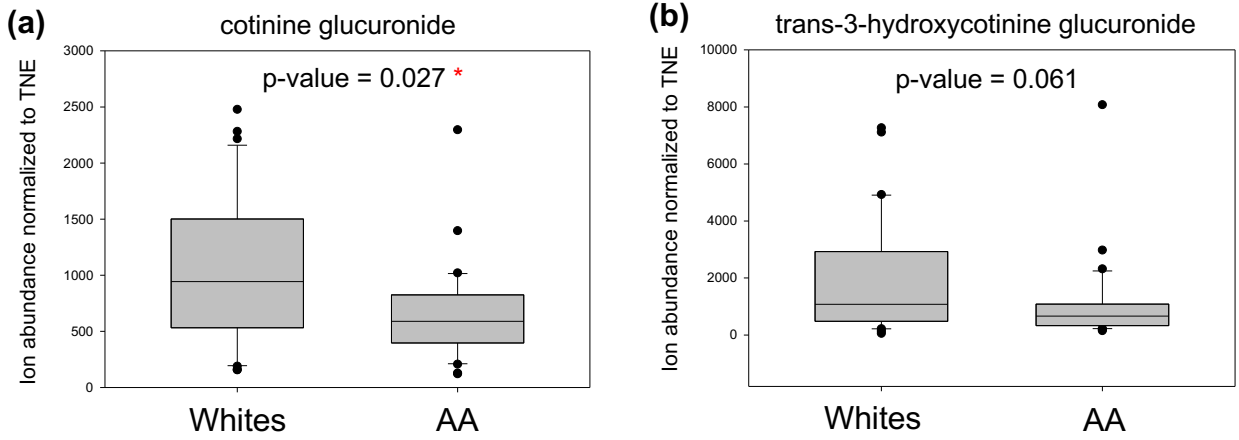

**Fig. S5.** (a) Ion abundance of cotinine glucuronide adjusted to TNE; (b) Ion abundance of trans-3-hydroxycotinine glucuronide adjusted to TNE in the metabolomics analysis.

# Figure S6

## (a) L-xylulose

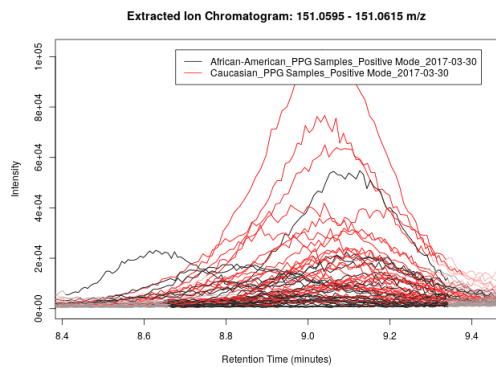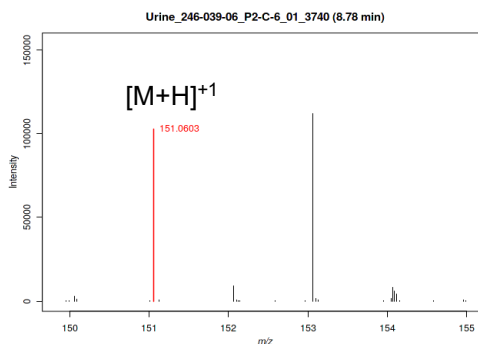

## (b) L-gulonate

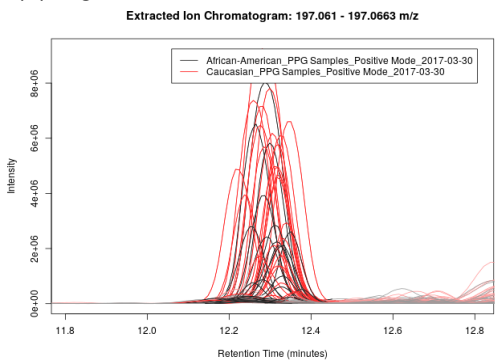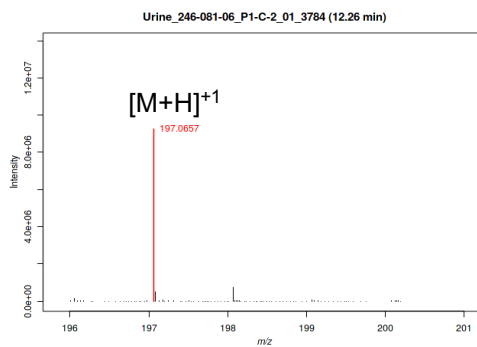

## (c) aldehydo-D-glucuronate/3-keto-L-gulonate

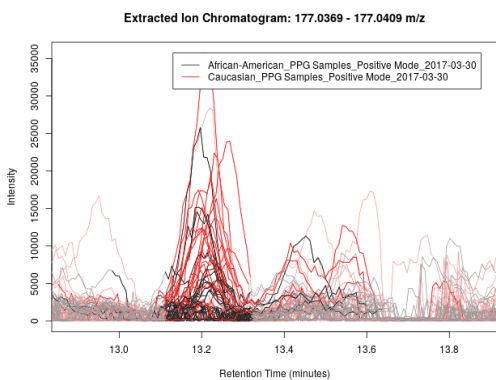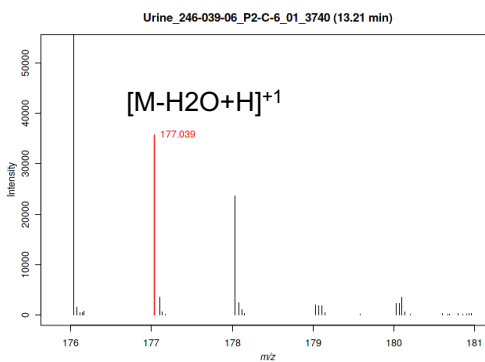

## (d) 3-pyridylacetate

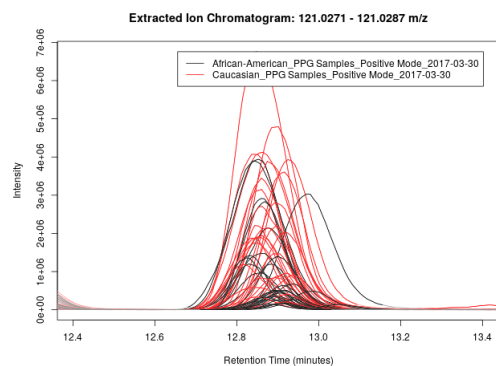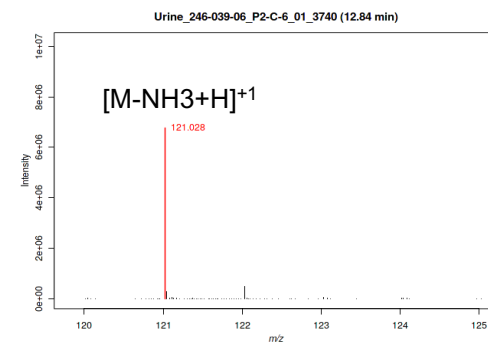



# Figure S6 (cont.)

## (e) 4-(3-pyridyl)-butanoate

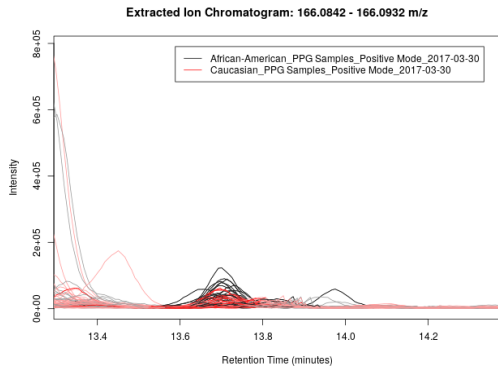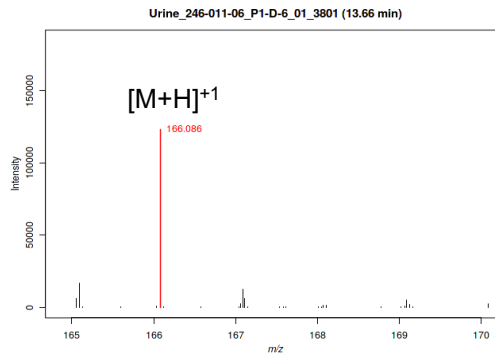

## (f) cotinine methonium ion

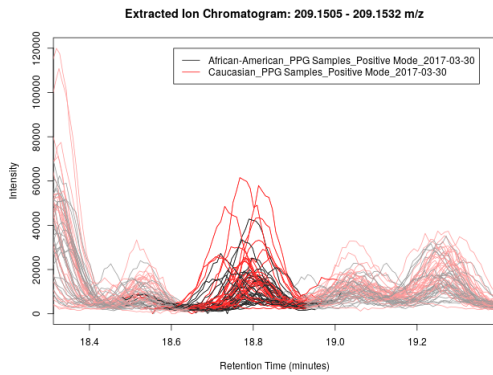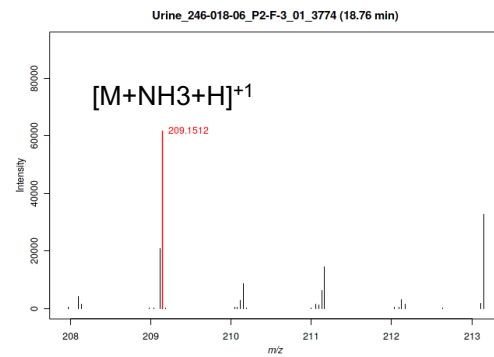

## (g) trans-3-hydroxycotinine-glucuronide

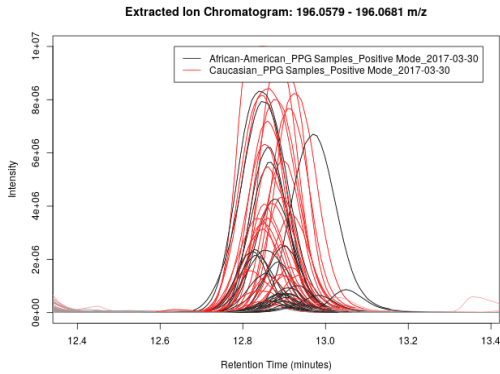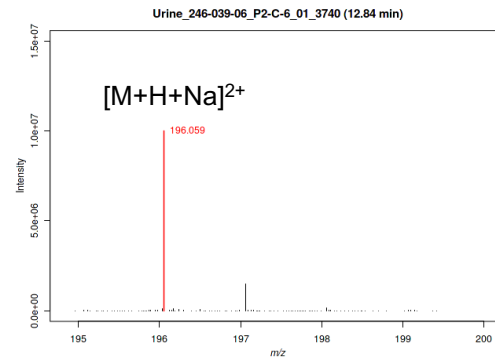

## (h) cotinine-glucuronide

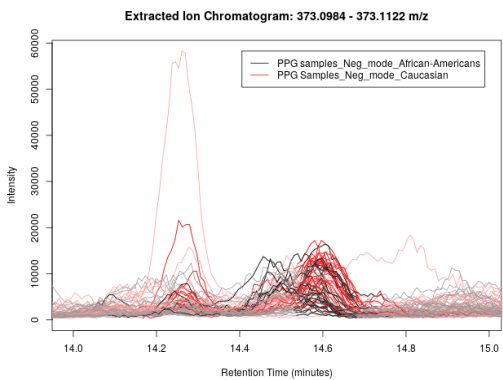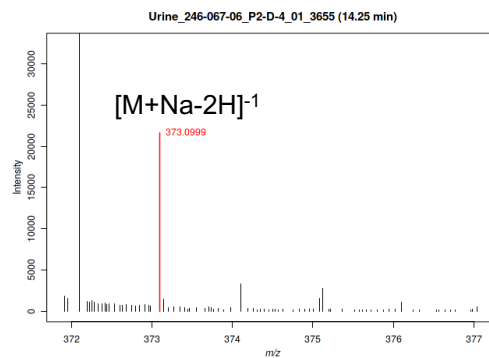

# Figure S6 (cont.)

## (i) palmitate

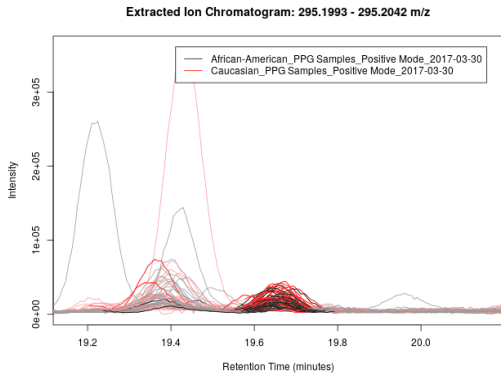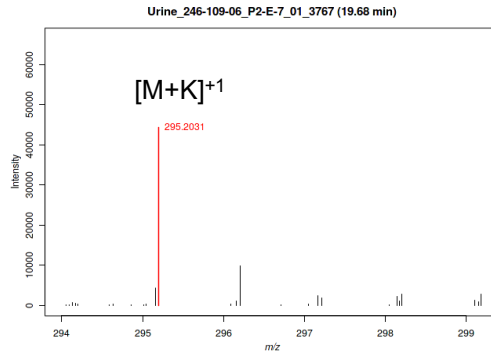

## (j) L-lysine

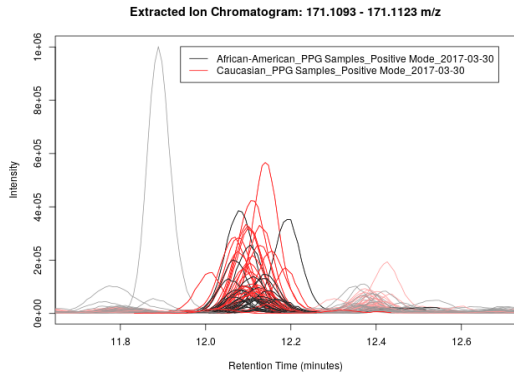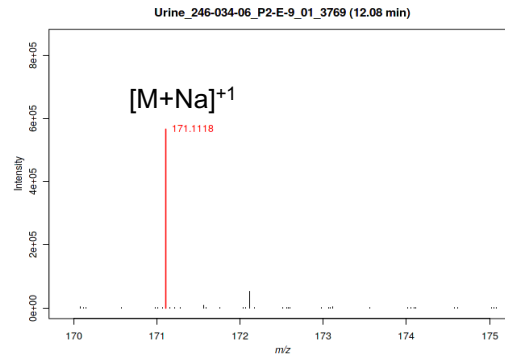

## (k) L-pipecolate

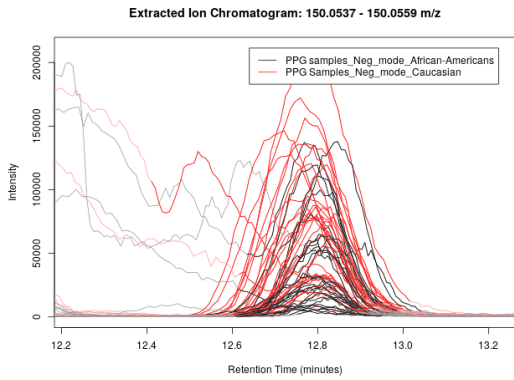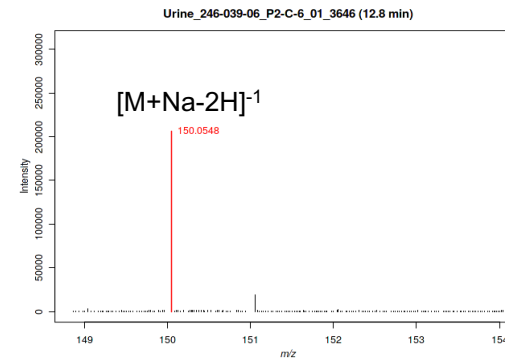

## (l) L-histidine

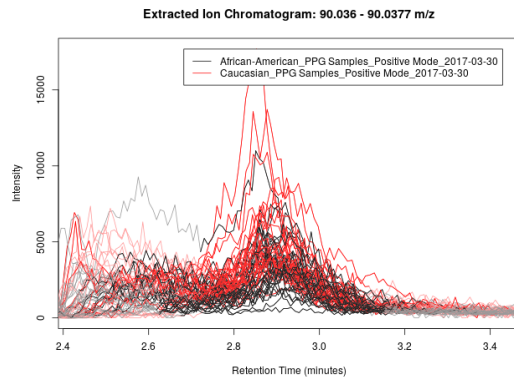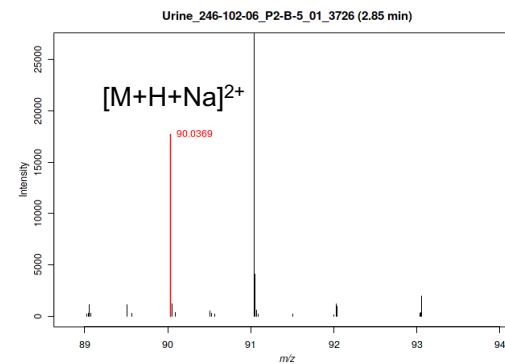

# Figure S6 (cont.)

(m) (R)-adrenaline

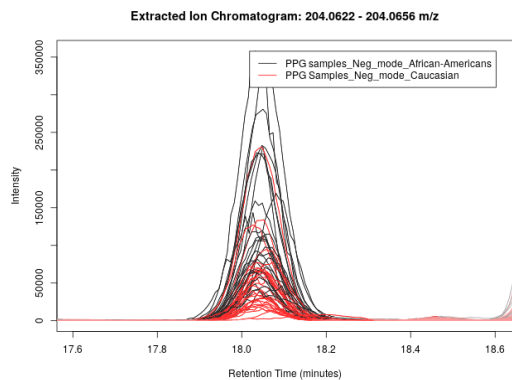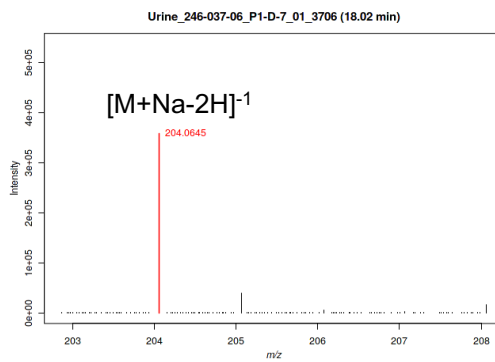

(n) 4 $\alpha$ -hydroxy-tetrahydrobiopterin

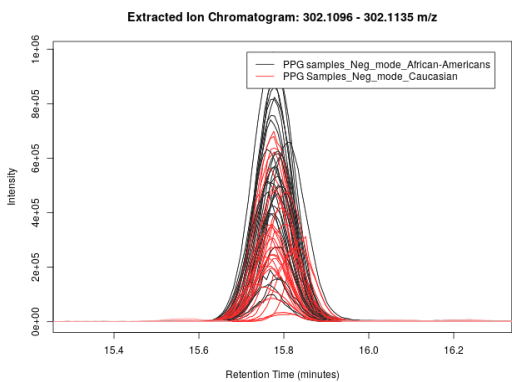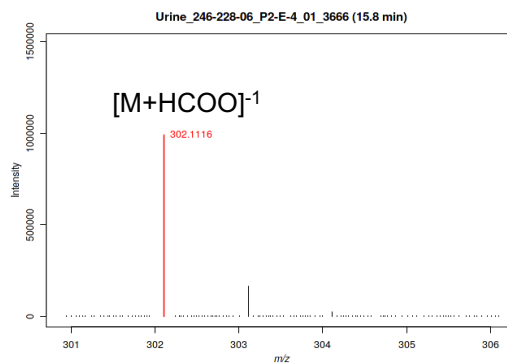

(o) L-ascorbate

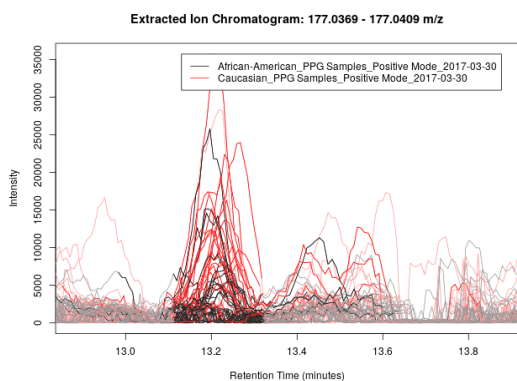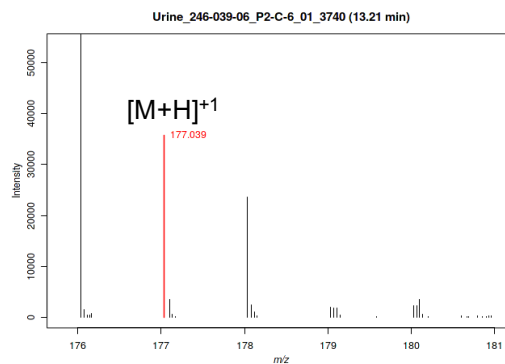

(p)  $\beta$ -D-glucose/ $\alpha$ -D-glucose/ $\beta$ -D-fructofuranose/ $\beta$ -D-galactose/ $\alpha$ -D-galactose

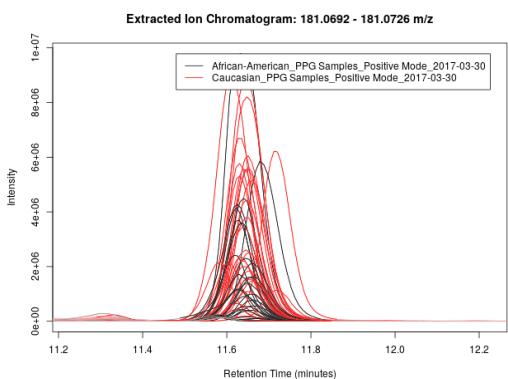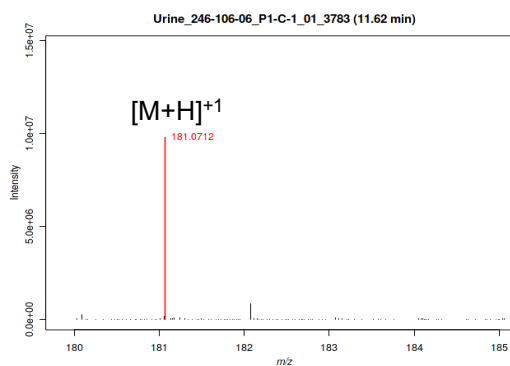

## Figure S6 (cont.)

(q) oleate

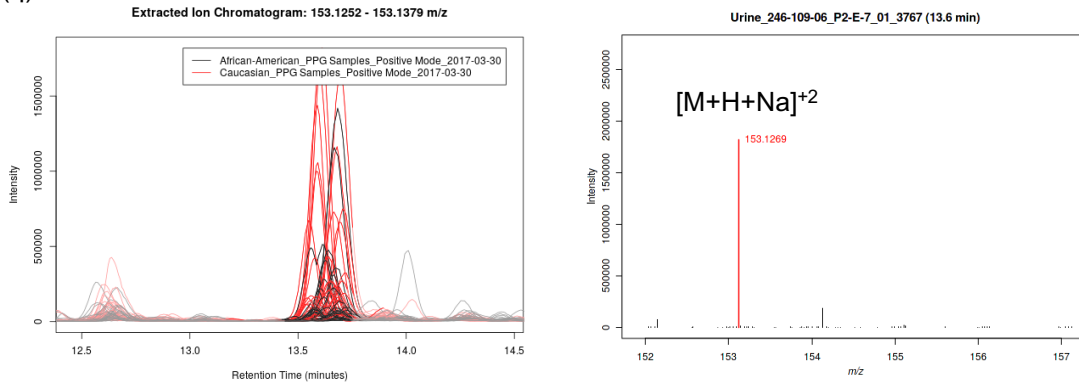

**Fig. S6.** Representative extracted ion chromatograms (EIC) and zoomed precursor ion full scan MS spectra of putative metabolites associated with differentially regulated pathways identified in the multi-modal pathway analysis.

**Table S1. Demographics of subjects, NNAL levels, and nicotine metabolites data.**

| Subject                 | TNE<br>(nmol/mL) | Creatinine<br>(mg/mL) | NNAL<br>(pg/mL) | Age | Total COT<br>(ng/mL) | Total<br>3-HCOT<br>(ng/mL) | Free COT<br>(ng/mL) | Free<br>3-HCOT<br>(ng/mL) | COT-gluc<br>(ng/mL) |
|-------------------------|------------------|-----------------------|-----------------|-----|----------------------|----------------------------|---------------------|---------------------------|---------------------|
| <b>African American</b> |                  |                       |                 |     |                      |                            |                     |                           |                     |
| S001                    | 59               | 1.9                   | 106             | 50  | 4519                 | 2798                       | 1674                | 2128                      | 2845                |
| S002                    | 83               | 1.5                   | 158             | 45  | 4880                 | 3411                       | 2554                | 3097                      | 2326                |
| S003                    | 67               | 1.1                   | 167             | 46  | 2617                 | 2894                       | 1668                | 2365                      | 950                 |
| S004                    | 113              | 2.5                   | 317             | 50  | 3836                 | 7838                       | 2102                | 5572                      | 1734                |
| S005                    | 102              | 1.5                   | 213             | 53  | 5034                 | 15019                      | 4789                | 12846                     | 245                 |
| S006                    | 89               | 1.8                   | 285             | 57  | 3604                 | 9790                       | 1844                | 5582                      | 1761                |
| S007                    | 32               | 0.7                   | 151             | 50  | 2064                 | 1463                       | 1609                | 1031                      | 455                 |
| S008                    | 36               | 1.2                   | 192             | 52  | 1484                 | 7788                       | 991                 | 4500                      | 493                 |
| S009                    | 54               | 0.7                   | 125             | 40  | 2508                 | 3477                       | 1608                | 2417                      | 900                 |
| S010                    | 51               | 1.4                   | 125             | 33  | 3201                 | 7071                       | 2425                | 6265                      | 776                 |
| S011                    | 102              | 1.2                   | 298             | 43  | 5103                 | 18300                      | 4425                | 12057                     | 678                 |
| S012                    | 130              | 2.2                   | 242             | 52  | 4053                 | 18198                      | 2709                | 12989                     | 1344                |
| S013                    | 75               | 1.0                   | 152             | 44  | 5467                 | 11218                      | 2651                | 7514                      | 2816                |
| S014                    | 80               | 1.1                   | 206             | 50  | 7968                 | 6655                       | 2008                | 5355                      | 5961                |
| S015                    | 83               | 0.8                   | 340             | 50  | 2403                 | 11138                      | 1313                | 9045                      | 1090                |
| S016                    | 50               | 0.6                   | 164             | 50  | 3382                 | 10100                      | 3226                | 8176                      | 155                 |
| S017                    | 159              | 1.2                   | 380             | 49  | 11671                | 26943                      | 3756                | 20744                     | 7915                |
| S018                    | 93               | 1.8                   | 325             | 41  | 6064                 | 16659                      | 3337                | 11567                     | 2727                |
| S019                    | 68               | 1.4                   | 313             | 29  | 3728                 | 8669                       | 3259                | 7612                      | 470                 |
| S020                    | 100              | 1.0                   | 304             | 44  | 3677                 | 1225                       | 2045                | 687                       | 1632                |
| S021                    | 77               | 1.8                   | 490             | 49  | 7473                 | 12778                      | 4364                | 10122                     | 3109                |
| S022                    | 30               | 0.4                   | 140             | 49  | 2382                 | 2545                       | 1703                | 2175                      | 679                 |
| S023                    | 33               | 1.0                   | 129             | 43  | 1669                 | 5159                       | 618                 | 4020                      | 1051                |
| S024                    | 47               | 1.0                   | 102             | 54  | 3341                 | 5927                       | 1826                | 4728                      | 1515                |
| S025                    | 28               | 1.6                   | 60              | 28  | 1432                 | 4665                       | 1236                | 2566                      | 196                 |
| S026                    | 51               | 1.1                   | 114             | 54  | 2889                 | 5478                       | 1408                | 4458                      | 1481                |
| S027                    | 91               | 1.8                   | 257             | 54  | 5184                 | 9870                       | 2455                | 6262                      | 2729                |
| S028                    | 69               | 3.5                   | 367             | 40  | 5947                 | 7893                       | 3671                | 5879                      | 2276                |
| S029                    | 60               | 1.6                   | 91              | 55  | 2763                 | 13200                      | 1631                | 8504                      | 1132                |
| S030                    | 77               | 1.5                   | 410             | 26  | 5653                 | 8781                       | 3052                | 5944                      | 2601                |
| <b>White</b>            |                  |                       |                 |     |                      |                            |                     |                           |                     |
| S031                    | 53               | 1.3                   | 132             | 52  | 3624                 | 6591                       | 1429                | 4491                      | 2195                |
| S032                    | 69               | 0.4                   | 215             | 62  | 4172                 | 12031                      | 2483                | 8933                      | 1689                |
| S033                    | 124              | 1.3                   | 467             | 58  | 8103                 | 18639                      | 2499                | 12177                     | 5604                |
| S034                    | 95               | 1.0                   | 153             | 20  | 8594                 | 10321                      | 2624                | 7898                      | 5970                |
| S035                    | 30               | 2.5                   | 193             | 18  | 1665                 | 4961                       | 794                 | 4273                      | 871                 |
| S036                    | 79               | 1.6                   | 58              | 26  | 6616                 | 3809                       | 1975                | 2693                      | 4641                |
| S037                    | 70               | 1.3                   | 219             | 21  | 8278                 | 18385                      | 2217                | 14307                     | 6062                |
| S038                    | 98               | 1.9                   | 319             | 31  | 8412                 | 12639                      | 2430                | 9856                      | 5982                |
| S039                    | 77               | 1.7                   | 157             | 30  | 7139                 | 12240                      | 2581                | 8089                      | 4558                |
| S040                    | 47               | 0.9                   | 179             | 26  | 2379                 | 8787                       | 1221                | 7088                      | 1159                |
| S041                    | 131              | 1.3                   | 314             | 51  | 5456                 | 19850                      | 2985                | 16222                     | 2472                |
| S042                    | 95               | 1.4                   | 276             | 54  | 4237                 | 17637                      | 1544                | 12718                     | 2694                |
| S043                    | 90               | 1.5                   | 179             | 42  | 5087                 | 8346                       | 1931                | 5985                      | 3156                |
| S044                    | 76               | 0.5                   | 159             | 36  | 6165                 | 8487                       | 2612                | 6157                      | 3553                |
| S045                    | 29               | 0.5                   | 108             | 43  | 1500                 | 4660                       | 898                 | 3363                      | 601                 |
| S046                    | 173              | 2.3                   | 545             | 45  | 9920                 | 35479                      | 2287                | 30064                     | 7633                |
| S047                    | 153              | 1.9                   | 357             | 28  | 8050                 | 23859                      | 3378                | 18891                     | 4673                |
| S048                    | 73               | 1.5                   | 309             | 36  | 2961                 | 18336                      | 2246                | 14788                     | 715                 |
| S049                    | 115              | 1.2                   | 276             | 53  | 7661                 | 9743                       | 2574                | 8036                      | 5086                |
| S050                    | 62               | 1.2                   | 110             | 43  | 5075                 | 6346                       | 1652                | 5203                      | 3424                |
| S051                    | 75               | 0.8                   | 227             | 48  | 5270                 | 11624                      | 2382                | 7603                      | 2887                |
| S052                    | 20               | 0.3                   | 131             | 52  | 1078                 | 785                        | 607                 | 638                       | 471                 |
| S053                    | 40               | 0.9                   | 112             | 50  | 2239                 | 4492                       | 657                 | 3185                      | 1582                |
| S054                    | 132              | 1.2                   | 337             | 37  | 8999                 | 12145                      | 2585                | 8587                      | 6414                |
| S055                    | 74               | 1.1                   | 178             | 24  | 4680                 | 10503                      | 1819                | 7528                      | 2861                |
| S056                    | 107              | 1.5                   | 389             | 47  | 6343                 | 19174                      | 1678                | 13373                     | 4664                |
| S057                    | 53               | 0.8                   | 61              | 41  | 1620                 | 9067                       | 1527                | 5580                      | 93                  |
| S058                    | 64               | 0.4                   | 119             | 60  | 5801                 | 6887                       | 3037                | 5342                      | 2764                |
| S059                    | 63               | 0.9                   | 172             | 47  | 5629                 | 11248                      | 2183                | 8653                      | 3445                |
| S060                    | 41               | 0.4                   | 92              | 29  | 3176                 | 6824                       | 1212                | 5519                      | 1965                |

**Table S2. Levels of nicotine metabolites normalized to TNE.**

| <b>(a) cotinine glucuronide</b> | <b>AVG</b> | <b>STDEV</b> |
|---------------------------------|------------|--------------|
| Whites ( <i>n</i> =30)          | 40         | 18           |
| AA ( <i>n</i> =30)              | 24         | 16           |

  

| <b>(b) trans-3-hydroxycotinine glucuronide</b> | <b>AVG</b> | <b>STDEV</b> |
|------------------------------------------------|------------|--------------|
| Whites ( <i>n</i> =30)                         | 36         | 15           |
| AA ( <i>n</i> =30)                             | 33         | 22           |

  

| <b>(c) free cotinine</b> | <b>AVG</b> | <b>STDEV</b> |
|--------------------------|------------|--------------|
| Whites ( <i>n</i> =30)   | 27         | 7            |
| AA ( <i>n</i> =30)       | 35         | 13           |

  

| <b>(d) free trans-3-hydroxycotinine</b> | <b>AVG</b> | <b>STDEV</b> |
|-----------------------------------------|------------|--------------|
| Whites ( <i>n</i> =30)                  | 109        | 41           |
| AA ( <i>n</i> =30)                      | 89         | 39           |

  

| <b>(e) total cotinine</b> | <b>AVG</b> | <b>STDEV</b> |
|---------------------------|------------|--------------|
| Whites ( <i>n</i> =30)    | 67         | 19           |
| AA ( <i>n</i> =30)        | 59         | 19           |

  

| <b>(f) total trans-3-hydroxycotinine</b> | <b>AVG</b> | <b>STDEV</b> |
|------------------------------------------|------------|--------------|
| Whites ( <i>n</i> =30)                   | 145        | 51           |
| AA ( <i>n</i> =30)                       | 122        | 55           |

**Table S3. Differentially regulated metabolic pathways determined in the autonomous multi-modal pathway analysis with p-value =0.01 and 5 ppm mass tolerance.**

| Pathway                                                            | Overlapping putative metabolites <sup>1</sup> | % Overlapping putative metabolites <sup>1</sup> | All metabolites <sup>2</sup> | p-value |
|--------------------------------------------------------------------|-----------------------------------------------|-------------------------------------------------|------------------------------|---------|
| D-glucuronate degradation                                          | 5                                             | 83.3%                                           | 6                            | 0.0002  |
| bupropion degradation                                              | 4                                             | 80.0%                                           | 5                            | 0.0002  |
| nicotine degradation V                                             | 5                                             | 27.8%                                           | 18                           | 0.0002  |
| sucrose degradation                                                | 3                                             | 60.0%                                           | 5                            | 0.0002  |
| lysine degradation I (saccharopine pathway)                        | 3                                             | 42.9%                                           | 7                            | 0.0002  |
| lactose degradation III                                            | 2                                             | 100.0%                                          | 2                            | 0.0002  |
| D-galactose degradation V (Leloir pathway)                         | 2                                             | 100.0%                                          | 2                            | 0.0002  |
| lysine degradation II (pipecolate pathway)                         | 3                                             | 30.0%                                           | 10                           | 0.0002  |
| dermatan sulfate degradation (metazoa)                             | 2                                             | 66.7%                                           | 3                            | 0.0002  |
| trehalose degradation                                              | 2                                             | 66.7%                                           | 3                            | 0.0002  |
| thyroid hormone metabolism II (via conjugation and/or degradation) | 3                                             | 75.0%                                           | 4                            | 0.0002  |
| myo-inositol de novo biosynthesis                                  | 1                                             | 100.0%                                          | 1                            | 0.0003  |
| sulfite oxidation                                                  | 1                                             | 100.0%                                          | 1                            | 0.0003  |
| oleate biosynthesis                                                | 1                                             | 100.0%                                          | 1                            | 0.0003  |
| D-myo-inositol (1,4,5)-trisphosphate biosynthesis                  | 1                                             | 100.0%                                          | 1                            | 0.0003  |
| D-myo-inositol (1,4,5)-trisphosphate degradation                   | 1                                             | 100.0%                                          | 1                            | 0.0003  |
| thiamin salvage III                                                | 1                                             | 100.0%                                          | 1                            | 0.0003  |
| glycogenolysis                                                     | 1                                             | 100.0%                                          | 1                            | 0.0003  |
| 3-phosphoinositide biosynthesis                                    | 1                                             | 100.0%                                          | 1                            | 0.0003  |
| phosphatidylserine biosynthesis I                                  | 1                                             | 100.0%                                          | 1                            | 0.0003  |
| tRNA charging                                                      | 2                                             | 15.4%                                           | 13                           | 0.0003  |
| α-tocopherol degradation                                           | 1                                             | 50.0%                                           | 2                            | 0.0003  |
| UDP-N-acetyl-D-galactosamine biosynthesis II                       | 1                                             | 50.0%                                           | 2                            | 0.0003  |
| sorbitol degradation I                                             | 1                                             | 50.0%                                           | 2                            | 0.0003  |
| chondroitin sulfate degradation (metazoa)                          | 1                                             | 50.0%                                           | 2                            | 0.0003  |
| sulfate activation for sulfonation                                 | 1                                             | 50.0%                                           | 2                            | 0.0003  |
| phospholipases                                                     | 1                                             | 50.0%                                           | 2                            | 0.0003  |
| palmitate biosynthesis                                             | 1                                             | 50.0%                                           | 2                            | 0.0003  |
| histamine biosynthesis                                             | 1                                             | 50.0%                                           | 2                            | 0.0003  |
| stearate biosynthesis                                              | 1                                             | 50.0%                                           | 2                            | 0.0003  |
| carnosine biosynthesis                                             | 1                                             | 50.0%                                           | 2                            | 0.0003  |
| pyrimidine deoxyribonucleotide phosphorylation                     | 1                                             | 33.3%                                           | 3                            | 0.0004  |
| pyrimidine deoxyribonucleotides biosynthesis from CTP              | 1                                             | 33.3%                                           | 3                            | 0.0004  |
| phosphatidylcholine biosynthesis                                   | 1                                             | 33.3%                                           | 3                            | 0.0004  |
| homocarnosine biosynthesis                                         | 1                                             | 33.3%                                           | 3                            | 0.0004  |
| nicotine degradation IV                                            | 2                                             | 11.8%                                           | 17                           | 0.0004  |
| hydrogen sulfide biosynthesis (trans-sulfuration)                  | 1                                             | 25.0%                                           | 4                            | 0.0005  |
| choline degradation                                                | 1                                             | 25.0%                                           | 4                            | 0.0005  |
| tetrapyrrole biosynthesis                                          | 1                                             | 25.0%                                           | 4                            | 0.0005  |
| proline degradation                                                | 1                                             | 20.0%                                           | 5                            | 0.0007  |
| proline biosynthesis                                               | 1                                             | 20.0%                                           | 5                            | 0.0007  |
| ornithine de novo biosynthesis                                     | 1                                             | 20.0%                                           | 5                            | 0.0007  |
| pyrimidine deoxyribonucleotides de novo biosynthesis               | 1                                             | 20.0%                                           | 5                            | 0.0007  |
| histidine degradation                                              | 2                                             | 40.0%                                           | 5                            | 0.0007  |
| ascorbate recycling (cytosolic)                                    | 1                                             | 20.0%                                           | 5                            | 0.0007  |
| estradiol biosynthesis I                                           | 1                                             | 20.0%                                           | 5                            | 0.0007  |
| tryptophan degradation to 2-amino-3-carboxymuconate semialdehyde   | 1                                             | 20.0%                                           | 5                            | 0.0007  |
| thyronamine and iodothyronamine metabolism                         | 1                                             | 16.7%                                           | 6                            | 0.0009  |
| adenine and adenosine salvage III                                  | 2                                             | 33.3%                                           | 6                            | 0.0009  |
| adenosine nucleotides degradation                                  | 1                                             | 16.7%                                           | 6                            | 0.0009  |
| 4-hydroxyproline degradation                                       | 1                                             | 14.3%                                           | 7                            | 0.0012  |
| purine ribonucleosides degradation to ribose-1-phosphate           | 1                                             | 12.5%                                           | 8                            | 0.0017  |
| serotonin degradation                                              | 1                                             | 11.1%                                           | 9                            | 0.0022  |
| androgen biosynthesis                                              | 2                                             | 22.2%                                           | 9                            | 0.0022  |
| catecholamine biosynthesis                                         | 3                                             | 30.0%                                           | 10                           | 0.0029  |

1) Number of significantly dysregulated metabolites found in pathway

2) Total number of putative metabolites found in the pathway using the entire LC-MS analysis results

**Table S4. Differentially regulated metabolic pathways and the associated metabolites determined in the autonomous multi-modal pathway analysis ( p-value =0.01 and 5 ppm mass tolerance).**

| Pathway                                                              | METLIN ID | Dysregulation* | Fold Change | p-value  | m/z      | t <sub>R</sub> (min) | Adduct Form              |
|----------------------------------------------------------------------|-----------|----------------|-------------|----------|----------|----------------------|--------------------------|
| <b>D-glucuronate degradation</b>                                     |           |                |             |          |          |                      |                          |
| L-xylulose                                                           | 139       | DOWN           | 2.2         | 3.00E-03 | 151.0604 | 9.08                 | M+H[1+]                  |
| L-gulonate                                                           | 63144     | DOWN           | 2.4         | 2.40E-03 | 197.0652 | 12.29                | M+H[1+]                  |
| L-gulonate                                                           | 63144     | DOWN           | 3           | 1.50E-04 | 195.0503 | 11.99                | M-H[-]                   |
| aldehydo-D-glucuronate <sup>a</sup>                                  | NA        | DOWN           | 2           | 1.70E-03 | 177.0392 | 13.23                | M-H <sub>2</sub> O+H[1+] |
| 3-keto-L-gulonate <sup>a</sup>                                       | 58394     | DOWN           | 2           | 1.70E-03 | 177.0392 | 13.23                | M-H <sub>2</sub> O+H[1+] |
| <b>nicotine degradation V<sup>b</sup></b>                            |           |                |             |          |          |                      |                          |
| 3-pyridylacetate                                                     | NA        | DOWN           | 2.1         | 4.50E-03 | 121.0279 | 12.88                | M-NH <sub>3</sub> +H[1+] |
| 4-(3-pyridyl)-butanoate                                              | NA        | UP             | 1.7         | 6.60E-03 | 166.0855 | 13.71                | M+H[1+]                  |
| cotinine-glucuronide                                                 | NA        | DOWN           | 1.5         | 7.20E-03 | 373.1022 | 14.59                | M+Na-2H[-]               |
| cotinine methonium ion                                               | NA        | DOWN           | 1.5         | 5.00E-03 | 209.1516 | 18.8                 | M+NH <sub>3</sub> +H[1+] |
| trans-3-hydroxycotinine-glucuronide                                  | NA        | DOWN           | 2.1         | 6.00E-03 | 196.0593 | 12.85                | M+H+Na[2+]               |
| <b>nicotine degradation IV<sup>b</sup></b>                           |           |                |             |          |          |                      |                          |
| 3-pyridylacetate                                                     | NA        | DOWN           | 2.1         | 4.50E-03 | 121.0279 | 12.88                | M-NH <sub>3</sub> +H[1+] |
| 4-(3-pyridyl)-butanoate                                              | NA        | UP             | 1.7         | 6.60E-03 | 166.0855 | 13.71                | M+H[1+]                  |
| <b>sucrose degradation<sup>c</sup></b>                               |           |                |             |          |          |                      |                          |
| β-D-glucose                                                          | 3755      | DOWN           | 1.8         | 5.30E-03 | 179.0558 | 11.39                | M-H[-]                   |
| β-D-glucose                                                          | 3755      | DOWN           | 3.6         | 1.80E-04 | 181.0704 | 2.79                 | M+H[1+]                  |
| β-D-glucose                                                          | 3755      | DOWN           | 3.2         | 3.40E-04 | 181.0709 | 2.44                 | M+H[1+]                  |
| β-D-glucose                                                          | 3755      | DOWN           | 2           | 5.60E-03 | 181.0706 | 11.65                | M+H[1+]                  |
| α-D-glucose                                                          | 133       | DOWN           | 1.8         | 5.30E-03 | 179.0558 | 11.39                | M-H[-]                   |
| α-D-glucose                                                          | 133       | DOWN           | 3.6         | 1.80E-04 | 181.0704 | 2.79                 | M+H[1+]                  |
| α-D-glucose                                                          | 133       | DOWN           | 3.2         | 3.40E-04 | 181.0709 | 2.44                 | M+H[1+]                  |
| α-D-glucose                                                          | 133       | DOWN           | 2           | 5.60E-03 | 181.0706 | 11.65                | M+H[1+]                  |
| β-D-fructofuranose                                                   | 63197     | DOWN           | 1.8         | 5.30E-03 | 179.0558 | 11.39                | M-H[-]                   |
| β-D-fructofuranose                                                   | 63197     | DOWN           | 3.6         | 1.80E-04 | 181.0704 | 2.79                 | M+H[1+]                  |
| β-D-fructofuranose                                                   | 63197     | DOWN           | 3.2         | 3.40E-04 | 181.0709 | 2.44                 | M+H[1+]                  |
| β-D-fructofuranose                                                   | 63197     | DOWN           | 2           | 5.60E-03 | 181.0706 | 11.65                | M+H[1+]                  |
| <b>lactose degradation III<sup>c</sup></b>                           |           |                |             |          |          |                      |                          |
| β-D-galactose                                                        | NA        | DOWN           | 1.8         | 5.30E-03 | 179.0558 | 11.39                | M-H[-]                   |
| β-D-galactose                                                        | NA        | DOWN           | 3.6         | 1.80E-04 | 181.0704 | 2.79                 | M+H[1+]                  |
| β-D-galactose                                                        | NA        | DOWN           | 3.2         | 3.40E-04 | 181.0709 | 2.44                 | M+H[1+]                  |
| β-D-galactose                                                        | NA        | DOWN           | 2           | 5.60E-03 | 181.0706 | 11.65                | M+H[1+]                  |
| β-D-glucose                                                          | 3755      | DOWN           | 1.8         | 5.30E-03 | 179.0558 | 11.39                | M-H[-]                   |
| β-D-glucose                                                          | 3755      | DOWN           | 3.6         | 1.80E-04 | 181.0704 | 2.79                 | M+H[1+]                  |
| β-D-glucose                                                          | 3755      | DOWN           | 3.2         | 3.40E-04 | 181.0709 | 2.44                 | M+H[1+]                  |
| β-D-glucose                                                          | 3755      | DOWN           | 2           | 5.60E-03 | 181.0706 | 11.65                | M+H[1+]                  |
| <b>D-galactose degradation V (Leloir pathway)<sup>c</sup></b>        |           |                |             |          |          |                      |                          |
| β-D-galactose                                                        | NA        | DOWN           | 1.8         | 5.30E-03 | 179.0558 | 11.39                | M-H[-]                   |
| β-D-galactose                                                        | NA        | DOWN           | 3.6         | 1.80E-04 | 181.0704 | 2.79                 | M+H[1+]                  |
| β-D-galactose                                                        | NA        | DOWN           | 3.2         | 3.40E-04 | 181.0709 | 2.44                 | M+H[1+]                  |
| β-D-galactose                                                        | NA        | DOWN           | 2           | 5.60E-03 | 181.0706 | 11.65                | M+H[1+]                  |
| α-D-galactose                                                        | NA        | DOWN           | 1.8         | 5.30E-03 | 179.0558 | 11.39                | M-H[-]                   |
| α-D-galactose                                                        | NA        | DOWN           | 3.6         | 1.80E-04 | 181.0704 | 2.79                 | M+H[1+]                  |
| α-D-galactose                                                        | NA        | DOWN           | 3.2         | 3.40E-04 | 181.0709 | 2.44                 | M+H[1+]                  |
| α-D-galactose                                                        | NA        | DOWN           | 2           | 5.60E-03 | 181.0706 | 11.65                | M+H[1+]                  |
| <b>trehalose degradation<sup>c</sup></b>                             |           |                |             |          |          |                      |                          |
| β-D-glucose                                                          | 3755      | DOWN           | 1.8         | 5.30E-03 | 179.0558 | 11.39                | M-H[-]                   |
| β-D-glucose                                                          | 3755      | DOWN           | 3.6         | 1.80E-04 | 181.0704 | 2.79                 | M+H[1+]                  |
| β-D-glucose                                                          | 3755      | DOWN           | 3.2         | 3.40E-04 | 181.0709 | 2.44                 | M+H[1+]                  |
| β-D-glucose                                                          | 3755      | DOWN           | 2           | 5.60E-03 | 181.0706 | 11.65                | M+H[1+]                  |
| α-D-glucose                                                          | 133       | DOWN           | 1.8         | 5.30E-03 | 179.0558 | 11.39                | M-H[-]                   |
| α-D-glucose                                                          | 133       | DOWN           | 3.6         | 1.80E-04 | 181.0704 | 2.79                 | M+H[1+]                  |
| α-D-glucose                                                          | 133       | DOWN           | 3.2         | 3.40E-04 | 181.0709 | 2.44                 | M+H[1+]                  |
| α-D-glucose                                                          | 133       | DOWN           | 2           | 5.60E-03 | 181.0706 | 11.65                | M+H[1+]                  |
| <b>myo-inositol de novo biosynthesis<sup>c</sup></b>                 |           |                |             |          |          |                      |                          |
| myo-inositol                                                         | 144       | DOWN           | 1.8         | 5.30E-03 | 179.0558 | 11.39                | M-H[-]                   |
| myo-inositol                                                         | 144       | DOWN           | 3.6         | 1.80E-04 | 181.0704 | 2.79                 | M+H[1+]                  |
| myo-inositol                                                         | 144       | DOWN           | 3.2         | 3.40E-04 | 181.0709 | 2.44                 | M+H[1+]                  |
| myo-inositol                                                         | 144       | DOWN           | 2           | 5.60E-03 | 181.0706 | 11.65                | M+H[1+]                  |
| <b>D-myo-inositol (1,4,5)-trisphosphate biosynthesis<sup>c</sup></b> |           |                |             |          |          |                      |                          |
| myo-inositol                                                         | 144       | DOWN           | 1.8         | 5.30E-03 | 179.0558 | 11.39                | M-H[-]                   |
| myo-inositol                                                         | 144       | DOWN           | 3.6         | 1.80E-04 | 181.0704 | 2.79                 | M+H[1+]                  |
| myo-inositol                                                         | 144       | DOWN           | 3.2         | 3.40E-04 | 181.0709 | 2.44                 | M+H[1+]                  |
| myo-inositol                                                         | 144       | DOWN           | 2           | 5.60E-03 | 181.0706 | 11.65                | M+H[1+]                  |
| <b>glycogenolysis<sup>c</sup></b>                                    |           |                |             |          |          |                      |                          |
| β-D-glucose                                                          | 3755      | DOWN           | 1.8         | 5.30E-03 | 179.0558 | 11.39                | M-H[-]                   |
| β-D-glucose                                                          | 3755      | DOWN           | 3.6         | 1.80E-04 | 181.0704 | 2.79                 | M+H[1+]                  |
| β-D-glucose                                                          | 3755      | DOWN           | 3.2         | 3.40E-04 | 181.0709 | 2.44                 | M+H[1+]                  |
| β-D-glucose                                                          | 3755      | DOWN           | 2           | 5.60E-03 | 181.0706 | 11.65                | M+H[1+]                  |



Table S4 (cont.)

| Pathway                                                                  | METLIN ID | Dysregulation* | Fold Change | p-value  | m/z      | t <sub>R</sub> (min) | Adduct Form              |
|--------------------------------------------------------------------------|-----------|----------------|-------------|----------|----------|----------------------|--------------------------|
| <b>UDP-N-acetyl-D-galactosamine biosynthesis II<sup>c</sup></b>          |           |                |             |          |          |                      |                          |
| β-D-glucose                                                              | 3755      | DOWN           | 1.8         | 5.30E-03 | 179.0558 | 11.39                | M-H[-]                   |
| β-D-glucose                                                              | 3755      | DOWN           | 3.6         | 1.80E-04 | 181.0704 | 2.79                 | M+H[1+]                  |
| β-D-glucose                                                              | 3755      | DOWN           | 3.2         | 3.40E-04 | 181.0709 | 2.44                 | M+H[1+]                  |
| β-D-glucose                                                              | 3755      | DOWN           | 2           | 5.60E-03 | 181.0706 | 11.65                | M+H[1+]                  |
| <b>sorbitol degradation I<sup>c</sup></b>                                |           |                |             |          |          |                      |                          |
| keto-D-fructose                                                          | NA        | DOWN           | 1.8         | 5.30E-03 | 179.0558 | 11.39                | M-H[-]                   |
| keto-D-fructose                                                          | NA        | DOWN           | 3.6         | 1.80E-04 | 181.0704 | 2.79                 | M+H[1+]                  |
| keto-D-fructose                                                          | NA        | DOWN           | 3.2         | 3.40E-04 | 181.0709 | 2.44                 | M+H[1+]                  |
| keto-D-fructose                                                          | NA        | DOWN           | 2           | 5.60E-03 | 181.0706 | 11.65                | M+H[1+]                  |
| <b>lysine degradation I (saccharopine pathway)<sup>d</sup></b>           |           |                |             |          |          |                      |                          |
| L-saccharopine                                                           | 383       | DOWN           | 1.9         | 4.90E-03 | 301.1362 | 10.38                | M+Na[1+]                 |
| L-2-aminoadipate                                                         | 3271      | DOWN           | 2.2         | 5.40E-03 | 185.0652 | 2.47                 | M+Na[1+]                 |
| L-2-aminoadipate                                                         | 3271      | DOWN           | 2.6         | 5.00E-03 | 185.0651 | 2.8                  | M+Na[1+]                 |
| L-lysine                                                                 | 25        | DOWN           | 1.9         | 3.70E-03 | 171.1112 | 12.12                | M+Na[1+]                 |
| <b>lysine degradation II (pipecolate pathway)<sup>d</sup></b>            |           |                |             |          |          |                      |                          |
| L-2-aminoadipate                                                         | 3271      | DOWN           | 2.2         | 5.40E-03 | 185.0652 | 2.47                 | M+Na[1+]                 |
| L-2-aminoadipate                                                         | 3271      | DOWN           | 2.6         | 5.00E-03 | 185.0651 | 2.8                  | M+Na[1+]                 |
| L-pipecolate                                                             | 50        | DOWN           | 2           | 2.40E-03 | 150.0546 | 12.8                 | M+Na-2H[-]               |
| L-lysine                                                                 | 25        | DOWN           | 1.9         | 3.70E-03 | 171.1112 | 12.12                | M+Na[1+]                 |
| <b>tRNA charging<sup>e</sup></b>                                         |           |                |             |          |          |                      |                          |
| L-histidine                                                              | 21        | DOWN           | 1.5         | 4.90E-03 | 90.0367  | 2.89                 | M+H+Na[2+]               |
| L-lysine                                                                 | 25        | DOWN           | 1.9         | 3.70E-03 | 171.1112 | 12.12                | M+Na[1+]                 |
| <b>histidine degradation<sup>e</sup></b>                                 |           |                |             |          |          |                      |                          |
| urocanate                                                                | 298       | DOWN           | 1.8         | 5.40E-03 | 183.0397 | 9.61                 | M+HCOO[-]                |
| L-histidine                                                              | 21        | DOWN           | 1.5         | 4.90E-03 | 90.0367  | 2.89                 | M+H+Na[2+]               |
| <b>pyrimidine deoxyribonucleotide phosphorylation<sup>f</sup></b>        |           |                |             |          |          |                      |                          |
| dTTP                                                                     | 3577      | DOWN           | 1.7         | 1.50E-04 | 504.9796 | 10.04                | M+Na[1+]                 |
| <b>pyrimidine deoxyribonucleotides biosynthesis from CTP<sup>f</sup></b> |           |                |             |          |          |                      |                          |
| dTTP                                                                     | 3577      | DOWN           | 1.7         | 1.50E-04 | 504.9796 | 10.04                | M+Na[1+]                 |
| <b>pyrimidine deoxyribonucleotides de novo biosynthesis<sup>f</sup></b>  |           |                |             |          |          |                      |                          |
| dTTP                                                                     | 3577      | DOWN           | 1.7         | 1.50E-04 | 504.9796 | 10.04                | M+Na[1+]                 |
| <b>dermatan sulfate degradation (metazoa)</b>                            |           |                |             |          |          |                      |                          |
| α-L-iduronate <sup>a</sup>                                               | NA        | DOWN           | 2           | 1.70E-03 | 177.0392 | 13.23                | M-H <sub>2</sub> O+H[1+] |
| sulfate                                                                  | 3235      | DOWN           | 2.1         | 6.80E-03 | 136.9301 | 1.89                 | M+K[1+]                  |
| <b>oleate biosynthesis</b>                                               |           |                |             |          |          |                      |                          |
| oleate                                                                   | 190       | DOWN           | 3.8         | 6.70E-03 | 153.1264 | 13.58                | M+H+Na[2+]               |
| <b>palmitate biosynthesis<sup>g</sup></b>                                |           |                |             |          |          |                      |                          |
| palmitate                                                                | 187       | DOWN           | 1.5         | 4.20E-03 | 295.2024 | 19.65                | M+K[1+]                  |
| <b>stearate biosynthesis<sup>g</sup></b>                                 |           |                |             |          |          |                      |                          |
| palmitate                                                                | 187       | DOWN           | 1.5         | 4.20E-03 | 295.2024 | 19.65                | M+K[1+]                  |
| <b>α-tocopherol degradation</b>                                          |           |                |             |          |          |                      |                          |
| α-carboxyethylhydroxychroman                                             | NA        | DOWN           | 1.6         | 3.60E-05 | 151.0743 | 18.18                | M+H+Na[2+]               |
| <b>tetrapyrrole biosynthesis</b>                                         |           |                |             |          |          |                      |                          |
| 5-aminolevulinic acid                                                    | 75        | DOWN           | 2           | 4.90E-03 | 155.0554 | 9.87                 | M+Na[1+]                 |
| <b>proline degradation<sup>h</sup></b>                                   |           |                |             |          |          |                      |                          |
| L-glutamate-5-semialdehyde                                               | 295       | DOWN           | 2           | 4.90E-03 | 155.0554 | 9.87                 | M+Na[1+]                 |
| <b>proline biosynthesis<sup>h</sup></b>                                  |           |                |             |          |          |                      |                          |
| L-glutamate-5-semialdehyde                                               | 295       | DOWN           | 2           | 4.90E-03 | 155.0554 | 9.87                 | M+Na[1+]                 |
| <b>ornithine de novo biosynthesis<sup>h</sup></b>                        |           |                |             |          |          |                      |                          |
| L-glutamate-5-semialdehyde                                               | 295       | DOWN           | 2           | 4.90E-03 | 155.0554 | 9.87                 | M+Na[1+]                 |
| <b>catecholamine biosynthesis</b>                                        |           |                |             |          |          |                      |                          |
| (R)-adrenaline                                                           | 62        | UP             | 2.3         | 3.10E-04 | 204.0641 | 18.04                | M+Na-2H[-]               |
| 4α-hydroxy-tetrahydrobiopterin                                           | 64413     | UP             | 1.7         | 1.90E-04 | 302.1112 | 15.78                | M+HCOO[-]                |
| L-ascorbate <sup>a</sup>                                                 | 249       | DOWN           | 2           | 1.70E-03 | 177.0392 | 13.23                | M+H[1+]                  |
| <b>ascorbate recycling (cytosolic)</b>                                   |           |                |             |          |          |                      |                          |
| L-ascorbate <sup>a</sup>                                                 | 249       | DOWN           | 2           | 1.70E-03 | 177.0392 | 13.23                | M+H[1+]                  |

\*Dysregulation (fold change) relative to Whites; NA: not applicable

a) Isobaric putative metabolite/metabolites

b) Pathways with overlapping metabolite/metabolites-1

c) Pathways with overlapping metabolite/metabolites-2

d) Pathways with overlapping metabolite/metabolites-3

e) Pathways with overlapping metabolite/metabolites-4

f) Pathways with overlapping metabolite/metabolites-5

g) Pathways with overlapping metabolite/metabolites-6

h) Pathways with overlapping metabolite/metabolites-7
